# Supplementary material
Source: Springer Nature journal article supplement (https://www.springermedizin.de/resource/supplementary/12913_2008_895_MOESM3_ESM.pdf/9536390)

**First Sulfonylurea Therapy (N=1256)**

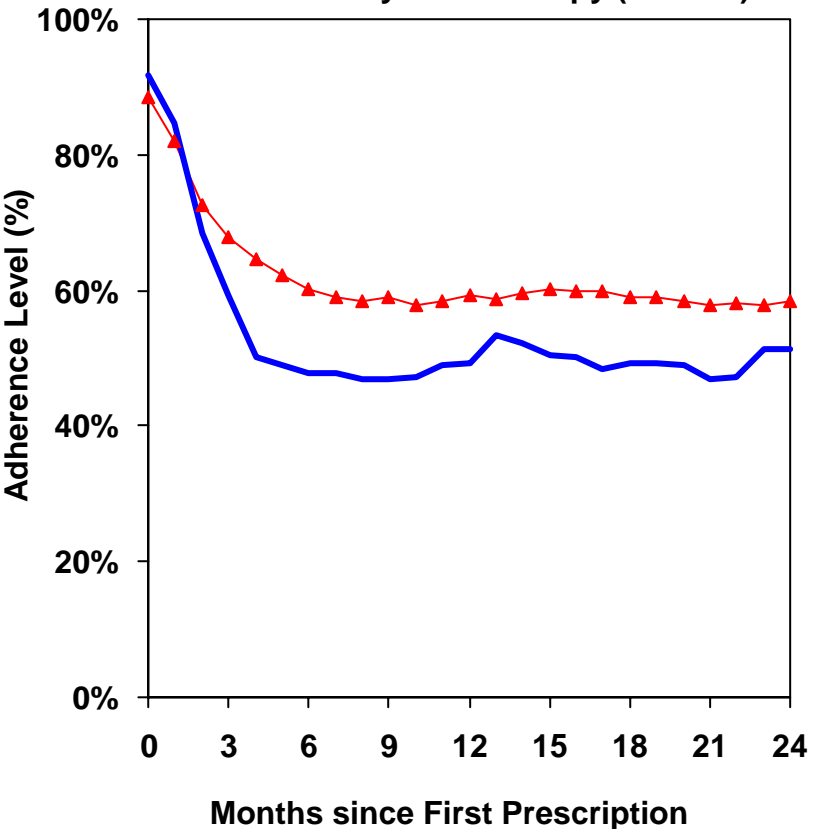

**First Metformin Therapy (n=148)**

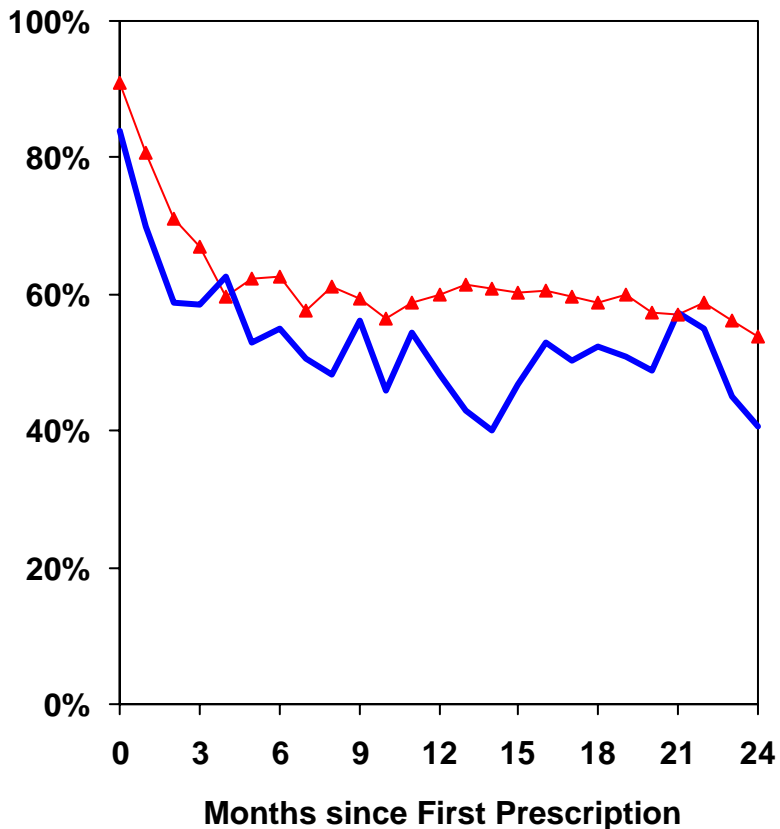

 Black

 White

Supplement: MOESM3 [file 9536390]
